# Supplementary material for: The Type IV Secretion System of ICEAfe1: Formation of a Conjugative Pilus in Acidithiobacillus ferrooxidans
Source: Front Microbiol. 2019 Feb 5;10:30. doi: 10.3389/fmicb.2019.00030 (PMC6370655; doi:10.3389/fmicb.2019.00030)
Supplement: Supplementary file 2 [file Table_2.xlsx]

## Sheet: S2
	Module	Feature	Gene	Motif	E-value	POG	POG E	Function	Strand	Size (aa)
		AFE0987		COG0613	1.2e-46			Predicted metal-dependent phosphoesterases (PHP family)	+	286
		AFE0988		COG0628	0.000892			Putative membrane protein	+	346
		AFE0989						Hypothetical protein	-	230
		AFE0990						Hypothetical protein	+	130
		AFE0991	rlmB	COG0566	7e-57			23S rRNA (guanosine-2'-O-) -methyltransferase RlmB	+	255
		AFE0992	tatD	COG0084	7.56e-63			Mg-dependent DNase	+	257
		AFE0093	phnP	COG1235	9.98e-35			Metal-dependent hydrolases of the beta-lactamase superfamily I	+	252
attL	attL							tRNA-Ala-GGC		(76 bp)
		AFE0995	int	cd01192	2.69e-57	POG0269	3e-89	Site-specific recombinase, phage integrase family	-	349
		AFE0996	xis	TIGR01764	8.49e-05			DNA binding protein, excisionase family	-	119
		AFE0997						Hypothetical protein	-	140
		AFE0998	cI	COG2932	1.61e-17	POG0306	5e-23	Phage repressor cI	-	243
		AFE0999	cro	COG4197	1.55e-08	POG0584	0.064	Phage antirrepressor, Cro	+	69
		AFE1000	bro	COG3617	5.87e-26	POG0404	3e-22	Prophage antirepressor Bro	+	419
		AFE1001				POG1250	0.003	Phage protein	+	394
		AFE1002						Phage protein	+	232
		AFE1003						Hypothetical protein	+	66
		AFE1004						Hypothetical protein	+	71
		AFE1005						Hypothetical protein	+	250
		AFE1006						Hypothetical protein	+	167
		AFE1007	mltE	COG0741	3e-08	POG0443	1e-12	Soluble lytic murein transglycosylase	+	209
		AFE1008				POG0064	0.018	Hypothetical protein	+	124
		AFE1010						Hypothetical protein	+	98
		AFE1011						Hypothetical protein	+	91
		AFE1012						Hypothetical protein	+	91
		AFE1013	traB	COG0550	1e-141			DNA Topoisomerase IA, TraB	+	705
		AFE1014						Hypothetical protein	+	138
		AFE1015						Hypothetical protein	+	116
		AFE1016	dsbB	COG1495	0.016			Disulfide bond formation protein B	+	289
		AFE1018	dsbG	COG0526	0.034			Thiol:disulfide isomerase DsbG	+	218
								Hypothetical protein	+	145
		AFE1020						Hypothetical protein	+	91
		AFE1021						Hypothetical protein	+	82
		AFE1022	rssA	COG1752	3e-39			Esterase,alpha-beta hydrolase superfamily	+	285
		AFE1023		COG1403	1e-07	POG0222	3e-11	HNH endonuclease	+	454
		AFE1024	spoIVFB	COG1994	0.0007			Membrane-associated zinc metalloprotease	+	196
		CDS						Hypothetical protein	+	84
		AFE1025						Hypothetical protein	+	78
		CDS						Hypothetical protein	+	89
		AFE1028		COG1502	9e-18			Phospholipase D	+	297
		AFE1029		COG3471	3e-10			Hypothetical protein	+	227
		AFE1030				POG0458	0.022	Phage protein	-	70
		AFE1031						Hypothetical protein	-	92
		AFE1032						Hypothetical protein	+	199
		AFE1033	orfA	COG2452	1.88e-28	POG0387	2e-07	Resolvase, IS605 family	+	204
		AFE1034	orfB	COG0675	9e-09	POG1336	3e-06	Transposase, IS605 family	+	501
		AFE1035		COG2940	0.002			Hypothetical protein	+	129
								CRISPR Repeat-Spacer Array I	-	(685 bp)
		AFE1037	csf4	TIGR03117	0			CRISPR associated protein, Csf4 family	-	769
		AFE1038	csf1	TIGR03114	2.86e-94			CRISPR associated protein, Csf1 family	+	249
		AFE1039	csf2	TIGR03115	6.55e-137			CRISPR associated protein, Csf2 family	+	353
		AFE1040	csf3	TIGR03116	1.31e-93			CRISPR associated protein, Csf3 family	+	230
		AFE1042	csy4	TIGR02563	1.01e-10			CRISPR associated protein, Csy4 family	+	209
								CRISPR Repeat-Spacer Array II	+	(1920 bp)
		AFE1044						Missannotated hypothetical protein	-	89
		AFE1045						Hypothetical protein	+	129
		AFE1046		TIGR01391	0.0051	POG0720	5e-09	Phage/plasmid primase, P4 family	+	147
		AFE1047	traA/I	TIGR02768	2.01e-27	POG0125	3e-16	Conjugal transfer relaxase TraA/recD family	+	711
		AFE1048						Hypothetical protein	+	232
		AFE1049						Putative lipoprotein	+	80
		AFE1050						Hypothetical protein	-	97
		AFE1051						Hypothetical protein	+	89
		AFE1052						Site-specific DNA methylase-like protein	+	69
		AFE1053	dndC	TIGR03183	4.81e-33	POG0483	0.0007	3'-phosphoadenosine 5'-phosphosulfate sulfotransferase	+	574
		AFE1054						Hypothetical protein	+	296
		AFE1055						Hypothetical protein	+	179
		AFE1056						Hypothetical protein	+	74
		AFE1057		COG2956	0.003			Sulfotransferase, TPR domain-containing protein	+	549
		AFE1058	tnp	COG0675	7e-34	POG1576	3e-26	Transposas, ISAfe8 family	-	408
		AFE1059						Hypothetical protein	+	220
		AFE1060				POG0234	0.046	Hypothetical protein	+	164
		AFE1062						Hypothetical protein	+	221
		AFE1061						Hypothetical protein	-	120
		AFE1063						Hypothetical protein	+	132
		AFE1064						Hypothetical protein	-	222
		AFE1065	trbN	pfam01464	4.74e-13			Conjugal muramidase TrbN/BfpH	+	196
		AFE1066	traF	pfam13728	4.74e-72			IncF plasmid conjugative transfer pilus assembly protein TraF	+	337
		AFE1067	traH	pfam06122	2.48e-34	POG0500	0.048	IncF plasmid conjugative transfer pilus assembly protein TraH (relaxome stabilizer)	+	559
		AFE1068	traG	pfam07916	8.98e-22			IncF plasmid conjugative transfer protein TraG	+	1218
		AFE1069						Hypothetical protein	+	169
		AFE1070	ihfA	COG0776	6e-23	POG0662	4e-13	Integration host factor alpha subunit	-	91
		AFE1071						Hypothetical protein	+	179
		AFE1072						Hypothetical protein	+	242
		AFE1073	bro	COG3617	2.67e-23	POG0404	1e-24	Prophage antirepressor	+	313
		AFE1074						Hypothetical protein	+	84
		AFE1075	dsbC	COG4091	0.092			Thiol:disulfide isomerase DsbC	+	372
		AFE1076						Hypothetical protein	+	116
		AFE1077						Hypothetical protein	+	292
		AFE1078	traL	pfam07178	1.69e-07			IncF plasmid conjugative transfer pilus assembly protein TraL	+	92
		AFE1079	traE	TIGR02761	1.49e-73			IncF plasmid conjugative transfer pilus assembly protein TraE	+	204
		AFE1080	traK	pfam06586	2.19e-15	POG1213	0.092	IncF plasmid conjugative transfer pilus assembly protein TraK	+	390
		AFE1081	traB	PRK13729	5.46e-12			IncF plasmid conjugative transfer pilus assembly protein TraB	+	543
		AFE1082	traV	TIGR02747	6.74e-60			IncF plasmid conjugative transfer pilus assembly protein TraV	+	165
		AFE1084	traA			POG0234	0.094	Type IV secretion-like conjugative transfer pilin subunit TraA	+	135
		CDS	traA			POG0234	0.043	Type IV secretion-like conjugative transfer pilin subunit TraA	+	136
		AFE1085	dsbG	COG1651	1e-09			Thiol:disulfide isomerase DsbG	+	274
		AFE1086	COG4240					Hypothetical protein	+	307
		AFE1087	pulE/pilB	COG2804	1e-93			Type II/IV secretion system proteins ATPase PilB	+	396
		AFE1088	dsbA	cd03019	1.54e-23			Periplasmic thiol:disulfide interchange protein DsbA	+	254
		AFE1089	traC	pfam11130	5.37e-23			IncF plasmid conjugative transfer pilus assembly protein TraC	+	866
		AE1090						Hypothetical protein	+	164
		AFE1091	traF	TIGR02771	1.6e-06			Type IV secretory pathway protease TraF-like protein	+	184
		AFE1093						Hypothetical protein	+	322
		AFE1094	dsbG	PRK11657	1.16e-07			Thiol:disulfide isomerase DsbG	+	266
		AFE1095	traW	TIGR02743	2.61e-11			IncF plasmid conjugative transfer pilus assembly protein TraW	+	422
		CDS						Hypothetical protein	+	93
		AFE1096	traU	pfam06834	1.56e-59			IncF plasmid conjugative transfer pilus assembly protein TraU	+	416
		AFE1097	traN	PRK12355	9.46e-26	POG0234	0.001	IncF plasmid conjugative transfer protein TraN	+	1019
		AFE1098	pemI	COG2336	3e-13			Antitoxin PemI family	+	79
		AFE1099	pemK	pfam02452	1.57e-21			Toxin PemK family	+	113
		AFE1100						Hypothetical protein	+	342
		AFE1101						Hypothetical protein	+	50
		AFE1102						Hypothetical protein	+	90
		AFE1103		COG1738	0.012			Hypothetical protein	+	341
		AFE1104	traN-like	COG0213	0.062			IncF plasmid conjugative transfer protein TraN	+	425
		AFE1105	orfA	COG2452	1e-37			Resolvase, IS605 family	+	196
		AFE1106	orfB	TIGR01766	1.06e-05			Transposase, IS605 family	+	549
		-		COG0635	0.071			Hypothetical protein	+	68
		AFE1109						Hypothetical protein	+	180
		AFE1108						Hypothetical protein	+	110
		-						Hypothetical protein	+	69
		AFE1109		pfam08378	1.16e-14			DNA topoisomerase, NERD domain-containing protein	+	225
		AFE1110	COG3547	COG3547	1e-11			Transposase, ISAfe32 family	-	408
		AFE1111						Hypothetical protein	+	139
		AFE1112						Hypothetical protein	+	103
		AFE1113						Hypothetical protein	+	77
		CDS						Hypothetical protein	+	79
		AFE1114	HtpX	COG0501	6e-30			Heat shock protein HtpX( EC:3.4.24.- )	+	273
		CDS				POG0587	6e-21	Phage protein	-	63
		AFE1115	PrpA	COG3855	0.004			Ser/Thr protein phosphatase family protein	+	263
		AFE1116						Phage protein	+	79
		AFE1117						Hypothetical protein	+	78
		AFE1118						Hypothetical protein	+	83
		AFE1119						Hypothetical protein	+	82
		AFE1120						Two component transcriptional regulator, winged helix family	+	317
		AFE1121				POG0698	2e-08	Phage protein	+	202
		AFE1122						Hypothetical protein	+	85
		-		COG5032	0.017			Phage protein	+	142
		-						Hypothetical protein	+	122
		AFE1124						Hypothetical protein	+	80
		AFE1125						Hypothetical protein	+	108
		AFE1126						Hypothetical protein	+	123
		AFE1127		COG3613	7e-22			Nucleoside 2-deoxyribosyltransferase	+	183
		AFE1128						Hypothetical protein	+	175
		AFE1129						Putative lipoprotein	+	52
		AFE1130		COG1674	1e-08			Cell division protein FtsK, C-t fragment	+
		CDS						Hypothetical protein	+	67
		CDS						Phage protein	+	97
		AFE1131							+	138
		AFE1133		cd00431	1.98e-10			Cysteine hydrolase	+	159
		-						Hypothetical protein	+	122
		-						Hypothetical protein	+	191
		AFE1135						Hypothetical protein	+	233
		AFE1136	DedA	COG0586	6e-20			Membrane protein, DedA family	+	176
		AFE1137	UvrD	COG0210	4e-78			ATP-dependent DNA helicase, UvrD/PcrA family	+	745
		AFE1138						Hypothetical protein	+	91
		AFE1140						Hypothetical protein	+	102
		AFE1141						Hypothetical protein	+	292
		AFE1142	tnp	COG3547	1e-11			Transposase, ISAfe32 family	+	408
		CDS						Hypothetical protein	+	190
		CDS						Hypothetical protein	+	130
		AFE1144						Hypothetical protein	+	76
		AFE1145	xerD/C	cd00798	3.88e-41	POG0269	5e-13	Site-specific tyrosine recombinase, XerDC integrase family	-	301
		AFE1146						Hypothetical protein	+	120
		AFE1147						Hypothetical protein	+	88
		AFE1148						Hypothetical protein	+	184
		AFE1149				POG0239	0.054	Hypothetical protein	-	145
		AFE1150						Hypothetical protein		180
		AFE1152	McrA	COG1403	2e-14	POG0222	5e-11	HNH endonuclease family protein	-	181
		AFE1153						Hypothetical protein	-	75
		AFE1154						Hypothetical protein	-	132
		AFE1155						tRNA-Arg-TCT	-	(76 bp)
		AFE1156						tRNA-Arg-TCG	-	(76 bp)
		AFE1157						tRNA-Leu-TAA	-	(85 bp)
		AFE1158						tRNA-Phe-GAA	-	(76 bp)
		AFE1159						tRNA-Leu-CAA	-	(85 bp)
		AFE1160						tRNA-Lys-TTT	-	(76 bp)
		AFE1161						tRNA-Gln-CTG	-	(76 bp)
		AFE1162						tRNA-Leu-CAG	-	(88 bp)
		AFE1163						tRNA-Glu-TTC	-	(77 bp)
		AFE1164						tRNA-Glu-CTC	-	(75 bp)
		AFE1165						tRNA-Arg-ACG	-	(76 bp)
		CDS						Hypothetical protein	-	92
		AFE1166						tRNA-Ile-GAT	-	(76 bp)
		AFE1167						tRNA-Val-TAC	-	(76 bp)
		AFE1168						tRNA-Met-CAT	-	(76 bp)
		AFE1169						Hypothetical protein	-	83
		AFE1170						Hypothetical protein	+	169
		AFE1171						tRNA-Met-CAT	-	(76 bp)
		AFE1172						tRNA-Cys-GCA	-	(75 bp)
		AFE1173						tRNA-Gln-TTG	-	(75 bp)
		AFE1174						Hypothetical protein	-	92
		AFE1175						tRNA-Thr-CGT	-	(76 bp)
		CDS						Hypothetical protein	-	113
		AFE1176						Hypothetical protein	-
		AFE1177						tRNA-Thr-TGT	-	(76 bp)
		CDS						Hypothetical protein	-	124
		AFE1178						Hypothetical protein	-	247
		AFE1179						tRNA-Asp-GTC	-	(77 bp)
		AFE1180						tRNA-His-GTG	-	(76 bp)
		AFE1181						tRNA-Ser-CGA	-	(92 bp)
		AFE1182						tRNA-Lys-CTT	-	(76 bp)
		AFE1183						tRNA-Pro-CGG	-	(78 bp)
		AFE1184						tRNA-Tyr-GTA	-	(85 bp)
		AFE1185						tRNA-Ser-GGA	-	(90 bp)
		AFE1186						tRNA-Ser-GCT		(89 bp)
		AFE1187						tRNA-Leu-TAG	-	(85 bp)
		AFE1188						tRNA-Ser-TGA	-	(91 bp)
		AFE1189						tRNA-Pro-TGG	-	(77 bp)
		AFE1190						tRNA-Asn-GTT	-	(75 bp)
		CDS						Hypothetical protein	+	138
		AFE1191						tRNA-Ala-TGC	-	(76 bp)
		AFE1192						tRNA-Gly-TCC	-	(76 bp)
		AFE1193						tRNA-Pseudo-GAA	-	(76 bp)
		AFE1194						tRNA-Trp-CCA	-	(77 bp)
		AFE1195						Hypothetical protein	+	138
		AFE1196						Hypothetical protein	+	138
		AFE1197		COG0758	0.008	POG1199	8e-21	Phage protein	-	279
		CDS						Hypothetical protein	-	76
		AFE1198						Hypothetical protein	-	89
		AFE1199	rnhA	COG0328	2e-23	POG1198	3e-20	Ribonuclease HI (EC 3.1.26.4)	-	145
		AFE1200						Hypothetical protein	-	207
		AFE1201	tnsA	pfam08722	1.57e-19			Tn7-like transposition protein A	+	276
		AFE1202	tnsB	pfam00665	3.7e-05			Tn7-like transposition protein B	+	722
		AFE1203	tnsC					Tn7-like transposition protein C	+	552
		AFE1204	tnsD					Tn7-like transposition protein D	+	609
		AFE1205	orf5					Hypothetical protein	+	555
		AFE1206		COG3899	4e-24			ATPase, putative adenylate/guanylate cyclase activity	-	1142
		AE1207						Hypothetical protein	-	30
		AFE1208	tapA	COG4625	0.0001			Outer membrane autotransporter barrel, C-terminal	+	991
		AFE1209	tapA	COG0810	1e-14			Outer membrane autotransporter barrel	+	3484
		AFE1210		pfam03171	3.79e-06	POG1579	0.009	2OG-Fe II oxygenase superfamily protein	+	248
		AFE1211		pfam00685	6.43e-13			Sulfotransferase, TPR domain-containing protein	+	695
		AFE1212		COG0859	1e-09			Hypothetical protein	+	385
		AFE1213						Hypothetical protein	-	48
		AFE1214						Hypothetical protein	-	154
		AFE1215	tnp	COG0675	1.01e-39	POG1576	1e-25	Transposase, ISAfe8 family	-	408
		AFE1216						Hypothetical protein	-	116
		AFE1217		COG1573	3.49e-21			Phage uracil-DNA glycosylase	-	203
		AFE1218						Hypothetical protein	-	238
		AFE1219		COG4422	5e-12	POG1066	1e-14	Phage protein	-	167
		CDS		COG4422	1e-19	POG1066	1e-37	Phage protein	-	161
		AFE1220		COG4771	0.039			Hypothetical protein	-	261
		AFE1221		COG0863	2e-08	POG0993	0.0004	Phage protein	-	204
		AFE1222		COG4571	0.01			Hypothetical protein	+	237
		AFE1223						Hypothetical protein	-	197
		AFE1225						Hypothetical protein	-	30
		AFE1226		COG0419	3e-06	POG0234	0.045	Putative GTP-binding protein, SMC domain protein	-	875
		AFE1227		COG0420	3e-19			Putative exonuclease	-	371
		CDS						Hypothetical protein	-	169
		AFE1229		COG2200	1e-21			Putative diguanylate phosphodiesterase (EAL domain)	-	228
		AFE1230	ligA	COG0272	1e-103	POG1501NAD-dependent	2e-22	NAD-dependent DNA ligase (EC 6.5.1.2)	-	609
		AFE1231						Hypothetical protein	-
		CDS						Hypothetical protein	+	137
						POG1236	0.014	Hypothetical protein	-
		AFE1232							-	312
		AFE1233		COG2852	3e-05			Hypothetical protein	-	151
		AFE1234		COG4803	0.0005			Putative lipoprotein	-	107
		AFE1235	trbE	COG3451	8e-07			Type IV secretion-like conjugative transfer ATPase TrbE	-	222
		AFE1234						Hypothetical protein	-
		AFE1237				POG1384phage	0.075	Hypothetical protein	-	121
		AFE1238						Hypothetical protein	-	57
		AFE1239						Hypothetical protein	-	66
		AFE1240		COG4229	0.051			Phage protein, phosphate acetyltransferase	-	206
		AFE1241	himA	COG0776	3e-15			DNA-binding protein HU family protein	-	91
		AFE1243	dksA/traR	COG1734	0.0004	POG0662	1e-10	Phage protein, transcriptional regulator DksA/TraR family	-	104
		AFE1244						Hypothetical protein	-	96
		AFE1245						Hypothetical protein	-	170
		AFE1246						Hypothetical protein	+	71
		AFE1247						Hypothetical protein	+	56
		AFE1248						Hypothetical protein	-	85
		AFE1249				POG0960	0.059	Hypothetical protein	-	350
		AFE1250						Hypothetical protein	+	63
		AFE1251	traD/G	TIGR03743	2.19e-20			Type IV secretion-like conjugative coupling protein	+	619
		CDS		COG3456	0.003			Hypothetical protein	+	159
		AFE1253				POG1411gp5	0.050	Hypothetical protein	+	369
		CDS						Hypothetical protein	+	145
		AFE1254		COG3921	0.007			HD-like nuclease, Cas3-like	+	835
		AFE1255		COG1595	0.007			Hypothetical protein	+	297
		AFE1256						Hypothetical protein	+	200
		AFE1257						Hypothetical protein	-	314
		AFE1258	traE	COG0550	5e-08			DNA topoisomerase III, TraE	-	429
		AFE1260	ssb	COG0629	5e-33	POG0745	1e-38	Single-stranded DNA-binding protein	+	161
		AFE1261						Hypothetical protein	+	76
		AFE1262						Hypothetical protein	-	66
		AFE1263						Hypothetical protein	-	227
		AFE1264		COG1022	0.052			Hypothetical protein, C-terminal half of AFE1266	-	1437
		AFE1265	tnp	COG3547	1e-11			Transposase, ISAfe32 family	-	408
		AFE1266						Hypothetical protein, N-terminal half of AFE1264	-	705
		AFE1269						Hypothetical protein	+	133
		AFE1270	erf	pfam04404	2.53e-17	POG0626	9e-21	Phage protein, DNA single-strand annealing proteins	+	211
		AFE1271						Hypothetical protein	+	115
		AFE1272						Hypothetical protein	+	131
		CDS						Hypothetical protein	+	67
		AFE1273						Hypothetical protein	+	160
		AFE1274						Hypothetical protein	+	117
		AFE1275		pfam11348	4.31e-33	POG0234	0.008	Hypothetical protein	+	303
		AFE1276						Hypothetical protein	+	122
		AFE1277						Hypothetical protein	+	181
		AFE1280						Hypothetical protein	-	104
		AFE1278						Hypothetical protein	+	147
		AFE1279		COG2176	0.094			Hypothetical protein	+	152
		CDS						Hypothetical protein	+	123
		AFE1281						Hypothetical protein	+	77
		CDS						Hypothetical protein	+	79
		AFE1282				POG0043	0.045	Phage protein	+	161
		AFE1283						Hypothetical protein	+	269
		AFE1284						Hypothetical protein	+	148
		AFE1285						Hypothetical protein	+	130
		AFE1286	yqaJ	COG5377	5e-15	POG1008	2e-16	Phage protein, double-strand DNA endonuclease	+	304
		AFE1287						Hypothetical protein	+	79
		AFE1288						Hypothetical protein	+	151
		AFE1289						Hypothetical protein	+	119
		AFE1290						Hypothetical protein	+	145
		AFE1291						Hypothetical protein	+	143
		AFE1292		COG2425	9e-06			Hypothetical protein	+	684
		AFE1293						Hypothetical protein	+	147
		AFE1294						Hypothetical protein	+	56
		AFE1295		COG2204	1e-09			Two component DNA-binding response regulator (N-terminal half)	+	212
		AFE1296	cysB	COG0583	1e-38			Sulfur assimilation transcriptional regulator, LysR family	+	320
		AFE1297	cobS	TIGR01650	1.58e-23	POG1506	8e-24	Aerobic cobaltochelatase subunit cobS	+	362
		AFE1298						Hypothetical protein	+	66
		AFE1299						Hypothetical protein, similar to AFE1308	+	297
		AFE1300						Hypothetical protein	+	172
		AFE1301	cysH	COG0175	3e-11	POG0483putative	5e-12	Phosphoadenosine phosphosulfate reductase	+	339
		AFE1302						Hypothetical protein	+	114
		CDS						Hypothetical protein	+	216
		AFE1304	orfA	COG2452	2e-26	POG0473phage	0.085	Resolvase, IS605 family	+	209
		AFE1305	orfB	COG0675	1e-05			Transposase, IS605 family	+	464
		AFE1307						Hypothetical protein	+	114
		CDS						Hypothetical protein	+	72
		AFE1308		COG1938	0.012			Hypothetical protein	+	246
		CDS						Hypothetical protein	+	114
		AFE1310						Hypothetical protein	+	39
		AFE1311						Hypothetical protein	+	175
		AFE1312						Hypothetical protein	-	55
		AFE1313						Hypothetical protein	+	228
		CDS						Hypothetical protein	+	172
		AFE1317						Hypothetical protein	+	66
		AFE1318						Phage protein (8e-32)	+	67
		AFE1319						Hypothetical protein	+	46
		AFE1320						Hypothetical protein	-	182
		AFE1321		COG0393	4e-18			Hypothetical protein	-	111
		AFE1322		COG3842	0.031			Hypothetical protein	-	211
		AFE1323	stbA	TIGR03739	4.91e-11			Plasmid stable inheritance protein	-	313
		AFE1324						Hypothetical protein	-	71
		AFE1325						Hypothetical protein	+	193
		AFE1326	antA	COG3561	2e-17	POG0271	2e-21	Anti-repressor protein	+	230
		AFE1327						Hypothetical protein	+	251
		AFE1328	tnp	COG0675	1e-11			Transposase, IS605 family	+	439
		AFE1329						Hypothetical protein	+	54
		AFE1330	tnp	COG3328	3e-43			Transposase, ISAfe2 family	+	420
		AFE1331		COG1475	0.041			Hypothetical protein	+	122
		AFE1332						Hypothetical protein	-	70
		AFE1333		COG3462	1e-06			Hypothetical protein	+	149
		AFE1334						Hypothetical protein	-
		CDS						Putative lipoprotein	+	113
		AFE1335				POG0497	0.029	Hypothetical protein	+	98
		AFE1336						Hypothetical protein	+	72
		AFE1337						Hypothetical protein	+	31
		AFE1338	pgpB	COG0671	2e-06			Membrane-associated phospholipid phosphatase	+	347
		AFE1339	wza	COG1596	2e-23			Polysaccharide export protein Wza	+	377
		AFE1340	wzc	COG0489	4e-33	POG1165	0.026	Polysaccharide chain length determinant protein Wzc	+	820
		AFE1341	wzb	COG4464	1e-28			Polysaccharide tyrosine-phosphatase Wzb	+	253
		AFE1342	galE2	COG1087	1e-137			UDP-glucose 4-epimerase	+	332
		AFE1343	ugdA	COG1004	1e-163			UDP-glucose/GDP-mannose dehydrogenaseses	+	440
		AFE1344	wzx	COG2244	1e-13			Polysaccharide export translocase Wzx	+	488
		AFE1345	mtf1	COG2227	2e-08			Methyltransferase	+	231
		AFE1346	gtf1	COG1216	8e-10	POG1267	0.035	Glycosyl transferase	+	343
		AFE1347						Hypothetical protein	+	305
		AFE1348	mtf2	pfam05175	0.00177			Methyltransferase	+	237
		AFE1349	gtf2	COG0438	9e-31			Glycosyl transferase	+	387
		AFE1350	wzy					Polysaccharide repeat unit polymerase Wzy	+	474
		AFE1351	gtf3	COG0438	2e-34			Glycosyl transferase	+	390
		AFE1352						Putatve lipoprotein	+	59
		AFE1353	epsH	COG0367	2e-73			Exosortase 1 system-associated amidotransferase EpsH	+	632
		AFE1354	gft4	COG0438	9e-32			Glycosyl transferase	+	382
		AFE1355	gft5	COG0438	6e-30			Glycosyltransferase	+	413
		AFE1356	manCt	COG0836	7e-15			Mannose-1-phosphate guanylyltransferase	+	68
		AFE1357	gft6	COG0438	3e-17			Glycosyltransferase	+	383
		AFE1358		COG3320	0.075			Hypothetical protein	+	130
		AFE1359		COG1669	0.000134			Nucleotidyltransferase, similar to AFE1363	+	134
		AFE1360		COG2250	2e-05			Hypothetical protein, similar to AFE1364	+	146
		AFE1361	stbC	COG4691	2e-09	POG0816	0.007	Plasmid stability protein StbC	+	97
		AFE1362	vapC	COG1487	4e-17			Plasmid stability protein VapC	+	142
		AFE1363						Nucleotidyltransferase, similar to AFE1359	+	134
		AFE1364		COG2250	2e-05			Hypothetical protein, similar to AFE1360	+	146
		AFE1365	hnh	COG1403	4e-08	POG0222	5e-13	HNH endonuclease	+	471
		AFE1366	manC	COG0836	1e-118			Mannose-1-phosphate guanylyltransferase/mannose-6-phosphate isomerase	+	480
		AFE1367		COG2442	3e-18			Hypothetical protein	+	75
		AFE1368		COG4118	6e-06			Hypothetical protein	+	117
		AFE1369´	yefM	COG4118	0.000376			Antitoxin YefM family	+	77
		AFE1369	vapC	COG5573	1e-23			Toxin VapC family	+	259
		AFE1370	epsD	COG2148	3e-68			Undecaprenyl-phosphate galactose phosphotransferase	+	484
		AFE1371	snf2	COG0553	3e-86	POG1333	9e-16	Superfamily II DNA/RNA helicase, SNF2 family	+	1381
		AFE1372	fic	COG3177	2e-20			Filamentation induced by cAMP protein Fic	-	388
		AFE1373	hel	COG1484	2e-39	POG0744	7e-07	Transposition helper protein, ISPsy14 family	-	252
		AFE1374	tnp, C-t	COG4584	7e-10			Inactivated Transposase, ISPsy14 family	-	262
		AFE1375	orf1					Transposase orf1	+	70
		AFE1376	orf2, N-t					Inactivated Transposase orf2	+	150
		CDS	orf2, C-t					Inactivated Transposase orf2	+	83
		AFE1378	orf3, res	COG1961	5e-20	POG0387	3e-09	Resolvase orf3	+	694
		AFE1377	tnp, N-t	COG4584				Inactivated Transposase, ISPsy14 family	+	325
		AFE1379						Hypothetical protein	-	54
		CDS						Hypothetical protein	-	45
		AFE1380						Hypothetical protein	-	98
		AFE1382						Hypothetical protein	-	71
		AFE1383	xre	COG5606	2e-09	POG0306	0.0004	Helix-turn-helix XRE-family like protein	-	102
		AFE1384		COG4679	5e-17			Phage protein	-	113
		AFE1385	hsdMt	COG0286	2e-91			Type I restriction-modification system subunit M, N-terminal truncation	-	433
		CDS	hsdM					Type I restriction-modification system subunit M, N-terminal	-	45
		CDS	hsdM					Type I restriction-modification system subunit M, N-terminal	-	43
		AFE1386						Hypothetical protein	+	74
attR	attR							tRNA-Ala-GGC		48 bp
		AFE1387		COG4398	2e-36			Hypothetical protein	+	378
		AFE1388	cydD	COG4988	1e-152			Transport ATP-binding protein CydD	+	577
		AFE1390	ctdC	COG4987	1e-129			Transport ATP-binding protein CydC	+	585
