# Supplementary material for: The Type IV Secretion System of ICEAfe1: Formation of a Conjugative Pilus in Acidithiobacillus ferrooxidans
Source: Front Microbiol. 2019 Feb 5;10:30. doi: 10.3389/fmicb.2019.00030 (PMC6370655; doi:10.3389/fmicb.2019.00030)
Supplement: Supplementary file 4 [file Table_4.xlsx]

## Sheet: S4
				9K-Fe / 9K-Sº			9K-Sº+Fe / 9K-Sº			9K-Fe 200 / 9K-Fe 62			Self-self control 9K-Fe62 / 9K-Fe 62
Gene cluster	Gene name	Gene ID	Probe ID	A	M	R	A	M	R	A	M	R	A	M	R
C1	orf1	-	1848	9.46	-0.120294	0.92	9.15	-0.736966	0.6	9.275	0.137504	1.1	9.45	-0.736966	0.6
C1	orf2	AFE1045	1847	10.3667	-0.270266	0.829167	10.75	-0.0551416	0.9625	10.65	-0.0242475	0.983333	11	-0.321928	0.8
C1	orf3	AFE1046	np	nd	nd	nd	nd	nd	nd	nd	nd	nd	nd	nd	nd
C1	traA/I	AFE1047	1846	9.44286	-0.296393	0.814286				10.06	0.0840643	1.06	9.7	-0.514573	0.7
C1	orf4	AFE1048	1845	8.96429	0.564204	1.47857	9.1625	0.446256	1.3625	9.71667	0.485427	1.4	10.2	-0.736966	0.6
C1	orf5	AFE1049	1844	12.8444	-0.561116	0.677778	nd	nd	nd	12.8167	0.282934	1.21667	15	-1	0.5
			AVE	10.2157	-0.136773	0.94396	9.6875	-0.115284	0.975	10.5037	0.193136	1.152	11.07	-0.662086	0.64
C2	trbN	AFE1065	1830	11.9375	-0.00602379	0.995833	11.6125	0.0531113	1.0375	12.9	0.180572	1.13333	11.9	-0.514573	0.7
C2	traF	AFE1066	1829	9.31429	0.296982	1.22857	9.03333	-0.321928	0.8	9.78333	0.242857	1.18333	10	-0.152003	0.9
C2	traH	AFE1067	1828	9.53182	0.190184	1.14091	8.75	-0.367732	0.775	9.175	-0.0365259	0.975	10	0	1
C2	traG	AFE1068	1827	9.13889	0.0931094	1.06667	8.8	0.378512	1.3	9.23333	-0.447459	0.733333	9.7	-0.321928	0.8
C2	orf11	AFE1069	1826	12.2478	-0.321928	0.8	12.1625	0.104337	1.075	14.55	0.39689	1.31667	11.9	-0.514573	0.7
			AVE	10.4341	0.0504646	1.0464	10.0717	-0.0307401	0.9975	11.1283	0.0672668	1.06833	10.7	-0.300616	0.82
C3	dsbG	AFE1075	1820	9.84211	0.349008	1.27368	9.21667	-0.0995357	0.933333	9.66	0.0840643	1.06	10.25	0.0703893	1.05
C3	orf13	AFE1076	1819	10.5875	-0.172181	0.8875	nd	nd	nd	11.25	0.468149	1.38333	10.25	-1.152	0.45
C3	orf14	AFE1077	1819	10.5875	-0.172181	0.8875	9.9625	-0.391191	0.7625	11.25	0.468149	1.38333	10.25	-1.152	0.45
C3	traL	AFE1078	1818	9.97222	0.0159415	1.01111	9.9625	-0.391191	0.7625	9.45	-0.0365259	0.975	nd	nd	nd
C3	traE	AFE1079	1817	8.975	0.754888	1.6875	nd	nd	nd	9.9	0.137504	1.1	9.6	-0.514573	0.7
C3	traK	AFE1080	1816	9.12105	0.0740006	1.05263	8.55	-0.234465	0.85	9.375	0.485427	1.4	10	-0.234465	0.85
C3	traB	AFE1081	1815	9.32105	0.324962	1.25263	9.25	-0.29956	0.8125	9.925	-0.192645	0.875	10.15	0.632268	1.55
C3	traV	AFE1082	1814	8.70909	0.161155	1.11818	nd	nd	nd	10.5667	0.536053	1.45	nd	nd	nd
C3	traA1	AFE1084	1813	11.3348	0.416605	1.33478	11.475	-0.321928	0.8	10.4	0.302563	1.23333	10.8	-1.32193	0.4
C3	traA2	-	np	nd	nd	nd	nd	nd	nd	nd	nd	nd	nd	nd	nd
C3	dsbG	AFE1085	1811	10.115	0.411426	1.33	9.8125	-0.321928	0.8	10.46	0.464668	1.38	9.9	-0.736966	0.6
C3	orf23	AFE1086	1810	9.3	0.378512	1.3	nd	nd	nd	10.4833	0.159199	1.11667	9.3	-1	0.5
C3	pilB	AFE1087	1809	8.57143	0.280108	1.21429	9.18333	-0.321928	0.8	8.7	0.137504	1.1	nd	nd	nd
C3	dsbA	AFE1088	1808	11.13	0.367371	1.29	nd	nd	nd	11.96	0.782409	1.72	11.95	-0.152003	0.9
C3	traC	AFE1089	1807	8.99091	-0.0534393	0.963636	8.625	0.925999	1.9	8.85	0.263034	1.2	9.8	0	1
C3	orf27	AE1090	1806	8.88	0.201634	1.15	9.1	0.0238467	1.01667	8.75	-0.234465	0.85	nd	nd	nd
C3	traF	AFE1091	1805	8.3125	0.57289	1.4875	nd	nd	nd	9.75	0.201634	1.15	9.6	-0.152003	0.9
C3	orf29	AFE1093	1804	8.62222	0.10806	1.07778	8.3	0.137504	1.1	8.6	0.847997	1.8	9.5	-0.321928	0.8
C3	dsbG	AFE1094	1803	10.7458	0.175258	1.12917	11.4125	0.57289	1.4875	10.56	0.163499	1.12	10.2	0	1
C3	traW	AFE1095	1802	11.1636	0.107384	1.07727	11.4	-0.0551416	0.9625	10.4167	0.302563	1.23333	10.3	-0.152003	0.9
C3	orf32			nd	nd	nd	nd	nd	nd	nd	nd	nd	nd	nd	nd
C3	traU	AFE1096	1801	8.43333	0.289507	1.22222	8.425	-0.367732	0.775	8.96667	0.900464	1.86667	9.35	-0.621488	0.65
C3	traN	AFE1097	1800	11.1833	0.21205	1.15833	11.35	0.485427	1.4	11.2	0.0473057	1.03333	10.6	-0.621488	0.65
			AVE	9.70945	0.228712	1.18599	9.735	-0.0439289	1.01083	10.0225	0.299455	1.25857	10.1059	-0.43707	0.785294
C4	orf35	AFE1250	1666	8.67143	0.040642	1.02857	8.3	-0.798366	0.575	9.2	0.180572	1.13333	10.2	0.137504	1.1
C4	traD/G	AFE1251	1665	11.6889	0.0238467	1.01667	11.6714	0.118644	1.08571	9.52	0.659925	1.58	10.75	-0.0740006	0.95
C4	orf37	AFE1253	1664	10.1	-0.292181	0.816667	nd	nd	nd	10.46	-0.286304	0.82	10.5	-0.152003	0.9
C4	orf38	AFE1254	1663	7.3	0.584963	1.5	nd	nd	nd	nd	nd	nd	nd	nd	nd
C4	orf39	AFE1255	1662	8.5	0.0703893	1.05	nd	nd	nd	9.325	0.232661	1.175	9.4	-0.736966	0.6
C4	orf40	AFE1256	1661	8.84444	0.0627358	1.04444	8.4	-1.32193	0.4	9.525	0.263034	1.2	10.2	-0.621488	0.65
C4	orf41	AFE1257	1660	9.4	0.0285692	1.02	nd	nd	nd	9.44	-0.473931	0.72	9.85	-0.152003	0.9
C4	traE	AFE1258	1659	11.07	0	1	nd	nd	nd	11.6	0.0238467	1.01667	11.95	-0.415037	0.75
			AVE	9.44685	0.0648706	1.05954	9.45714	-0.667217	0.686905	9.86714	0.0856862	1.09214	10.4071	-0.287714	0.835714
	trbE	AFE1235	1677	12.5292	-1.04891	0.483333	12.7375	0.827819	1.775	11.24	0.713696	1.64	12.95	0.722466	1.65
	traR	AFE1243	1672	9.92857	-0.0418202	0.971429	9.16667	-0.0489096	0.966667	nd	nd	nd	nd	nd	nd
			AVE	9.88243	0.0926744	1.09241	9.84719	-0.0850438	0.995621	10.2293	0.228309	1.20043	10.47	-0.386721	0.804286
	np= no probe
	nd=no data
